# Supplementary material for: Acoustic and Linguistic Features of Impromptu Speech and Their Association With Anxiety: Validation Study
Source: PubMed Central journal article supplement (PMC9308078; doi:10.2196/36828), 2022-07-08
Supplement: mental_v9i7e36828_app3.pdf [file mental_v9i7e36828_app3.pdf]

## Statements used to encourage speech when silence is detected:

- You still have some time left. Please continue!
- What are your personal strengths?
- What are your major shortcomings?
- Do you have enemies? Why?
- What do you think about teamwork?
- What do your boss/family/colleagues think about you? Why?
