# Supplementary material for: Acoustic and Linguistic Features of Impromptu Speech and Their Association With Anxiety: Validation Study
Source: PubMed Central journal article supplement (PMC9308078; doi:10.2196/36828), 2022-07-08
Supplement: mental_v9i7e36828_app5.pdf [file mental_v9i7e36828_app5.pdf]

## Correlation between Demographics and acoustic/Linguistic features

Significant correlations ( $P < .05$ ) are reported.

### Age vs Acoustic/Linguistic features

| Acoustic            |       |       |
|---------------------|-------|-------|
| Feature             | r     | P     |
| localabsoluteJitter | 0.27  | <.001 |
| mfcc_mean_6         | 0.13  | <.001 |
| mfcc_std_6          | -0.13 | <.001 |
| mfcc_mean_11        | 0.13  | <.001 |
| f0_median           | -0.12 | <.001 |
| lpcc_std_3          | 0.12  | <.001 |
| f0_mean             | -0.11 | <.001 |
| lpcc_std_2          | -0.11 | <.001 |
| mfcc_mean_8         | 0.10  | <.001 |
| intensity_std       | 0.10  | <.001 |
| mfcc_std_3          | -0.09 | <.001 |
| lpcc_std_10         | 0.09  | <.001 |
| lpcc_std_8          | -0.08 | 0.001 |
| f1_mean             | -0.07 | 0.004 |
| lpcc_mean_4         | -0.07 | 0.005 |
| lpcc_std_13         | 0.07  | 0.006 |
| mfcc_mean_10        | 0.06  | 0.009 |
| f3_stddev           | -0.06 | 0.01  |
| intensity_mean      | 0.06  | 0.01  |
| mfcc_std_5          | 0.06  | 0.01  |
| mfcc_mean_3         | 0.06  | 0.01  |
| f2_stddev           | -0.06 | 0.01  |
| f0_min              | -0.06 | 0.02  |
| lpcc_std_9          | -0.06 | 0.02  |
| mfcc_std_12         | 0.06  | 0.02  |
| lpcc_std_11         | 0.06  | 0.02  |
| mfcc_std_11         | 0.05  | 0.02  |
| f2_mean             | -0.05 | 0.04  |
| speaking_duration   | -0.05 | 0.04  |
| lpcc_std_5          | 0.05  | 0.04  |
| f1_stddev           | 0.05  | 0.046 |
| mfcc_std_8          | -0.05 | 0.047 |

| Linguistic |       |       |
|------------|-------|-------|
| Feature    | r     | P     |
| compare    | -0.18 | <.001 |
| insight    | -0.16 | <.001 |
| conj       | -0.15 | <.001 |
| see        | 0.14  | <.001 |
| cause      | -0.14 | <.001 |
| sexual     | -0.14 | <.001 |
| motion     | 0.13  | <.001 |
| relativ    | 0.13  | <.001 |
| discrep    | 0.13  | <.001 |
| article    | 0.13  | <.001 |
| they       | 0.12  | <.001 |
| achieve    | -0.12 | <.001 |
| adverb     | -0.12 | <.001 |
| focuspast  | 0.12  | <.001 |
| i          | -0.11 | <.001 |
| work       | -0.10 | <.001 |
| adj        | -0.10 | <.001 |
| sad        | 0.10  | <.001 |
| nonflu     | -0.10 | <.001 |
| number     | 0.10  | <.001 |
| informal   | -0.10 | <.001 |
| home       | 0.10  | <.001 |
| social     | 0.10  | <.001 |
| risk       | 0.10  | <.001 |
| negate     | 0.09  | <.001 |
| verb       | 0.09  | <.001 |
| space      | 0.09  | <.001 |
| cogproc    | -0.09 | <.001 |
| filler     | 0.09  | <.001 |
| leisure    | 0.08  | <.001 |
| ipron      | -0.08 | <.001 |
| ingest     | 0.08  | <.001 |
| time       | 0.08  | <.001 |
| WC         | -0.08 | <.001 |
| Sixltr     | -0.08 | 0.001 |

|         |       |       |
|---------|-------|-------|
| percept | 0.08  | 0.001 |
| drives  | -0.07 | 0.002 |
| auxverb | 0.07  | 0.002 |
| quant   | 0.07  | 0.002 |
| pronoun | -0.07 | 0.005 |
| Period  | 0.07  | 0.005 |
| you     | 0.06  | 0.006 |
| negemo  | 0.06  | 0.006 |
| family  | 0.06  | 0.009 |
| power   | -0.06 | 0.01  |
| money   | 0.06  | 0.01  |
| we      | 0.06  | 0.02  |
| male    | 0.05  | 0.03  |
| relig   | 0.05  | 0.03  |

Income vs Acoustic/Linguistic features

| Acoustic            |       |       |
|---------------------|-------|-------|
| Feature             | r     | P     |
| f0_median           | -0.22 | <.001 |
| f0_mean             | -0.22 | <.001 |
| mfcc_std_5          | 0.20  | <.001 |
| mfcc_mean_2         | 0.14  | <.001 |
| localabsolutejitter | 0.13  | <.001 |
| mfcc_std_11         | 0.13  | <.001 |
| lpcc_std_7          | 0.12  | <.001 |
| speaking_duration   | 0.10  | <.001 |
| mfcc_std_2          | 0.09  | <.001 |
| mfcc_mean_1         | 0.08  | <.001 |
| f3_mean             | -0.08 | <.001 |
| lpcc_std_3          | 0.08  | 0.001 |
| f2_mean             | -0.07 | 0.002 |
| mfcc_mean_6         | 0.07  | 0.002 |
| mfcc_std_4          | 0.07  | 0.002 |
| f4_stdev            | -0.07 | 0.003 |
| mfcc_mean_4         | 0.07  | 0.004 |
| lpcc_mean_4         | -0.07 | 0.004 |
| f2_stdev            | -0.07 | 0.004 |
| f4_mean             | -0.06 | 0.01  |
| f3_stdev            | -0.06 | 0.02  |
| f0_max              | -0.06 | 0.02  |

| Linguistic |       |       |
|------------|-------|-------|
| Feature    | r     | P     |
| space      | 0.13  | <.001 |
| i          | -0.13 | <.001 |
| relativ    | 0.13  | <.001 |
| we         | 0.12  | <.001 |
| WPS        | 0.11  | <.001 |
| negemo     | -0.11 | <.001 |
| Period     | -0.11 | <.001 |
| affect     | -0.11 | <.001 |
| AllPunc    | -0.11 | <.001 |
| article    | 0.11  | <.001 |
| anger      | -0.10 | <.001 |
| anx        | -0.10 | <.001 |
| motion     | 0.10  | <.001 |
| WC         | 0.09  | <.001 |
| ppron      | -0.09 | <.001 |
| family     | -0.08 | <.001 |
| female     | -0.07 | 0.002 |
| money      | 0.07  | 0.003 |
| feel       | -0.07 | 0.004 |
| posemo     | -0.07 | 0.005 |
| hear       | -0.06 | 0.007 |
| negate     | -0.06 | 0.009 |

|              |       |      |
|--------------|-------|------|
| f1_mean      | -0.05 | 0.03 |
| lpcc_std_12  | 0.05  | 0.03 |
| mfcc_mean_12 | 0.05  | 0.03 |
| lpcc_mean_5  | -0.05 | 0.04 |
| mfcc_mean_8  | 0.05  | 0.04 |

|         |       |      |
|---------|-------|------|
| assent  | -0.06 | 0.01 |
| you     | 0.06  | 0.02 |
| conj    | -0.06 | 0.02 |
| pronoun | -0.05 | 0.03 |
| certain | -0.05 | 0.04 |
| leisure | 0.05  | 0.04 |
| Apostro | -0.05 | 0.04 |
| relig   | -0.05 | 0.04 |
